# Supplementary material for: Polyelectrolytes Ability in Reducing Atrazine Concentration in Water: Surface Effects
Source: PubMed Central journal article supplement (PMC4150508; doi:10.1155/2014/162157), 2014-08-14
Supplement: 162157.f1.pdf [file 162157.f1.pdf]

## Supplementary material:

Table S1: Surface to volume ratio during the adsorption experiment by Nalco 71305 (initial  $5 \pm 0.2 \mu\text{g/l}$ )

| Conc (ppm) | Volume (ml) | Surface area ( $\text{cm}^2$ ) | Surface to volume ratio ( $\text{m}^{-1}$ ) | Atrazine final concentration ( $\mu\text{g/l}$ ) $\pm 0.4$ | Reduction % |
|------------|-------------|--------------------------------|---------------------------------------------|------------------------------------------------------------|-------------|
| 500        | 100         | 184                            | 1.83                                        | 2.3                                                        | 53.5        |
|            | 200         | 229                            | 1.15                                        | 2.5                                                        | 49.4        |
|            | 500         | 353                            | 0.71                                        | 2.9                                                        | 41.3        |
|            | 1000        | 547                            | 0.55                                        | 3.8                                                        | 23.1        |
|            | 2000        | 867                            | 0.43                                        | 4.1                                                        | 17.1        |
| 1000       | 100         | 184                            | 1.83                                        | 2.3                                                        | 53.9        |
|            | 200         | 229                            | 1.15                                        | 2.3                                                        | 53.5        |

Table S2: Isotherm of atrazine reduction by Nalco 71305 based on surface area

| Conc (ppm) | Area $\text{cm}^2$ | Volume (v) L | $C_e$ $\mu\text{g/L}$ | $C_0 - C = X$ $\mu\text{g/L}$ | $F = X/V$ $\mu\text{g}$ | $F/M = q$ $\mu\text{g/cm}^2$ |
|------------|--------------------|--------------|-----------------------|-------------------------------|-------------------------|------------------------------|
|            | (control)          |              | $5 \pm 0.2$           |                               |                         |                              |
| 500        | 184                | 0.1          | 2.3                   | 2.6                           | 0.26                    | 0.0014                       |
|            | 229                | 0.2          | 2.5                   | 2.4                           | 0.49                    | 0.0021                       |
|            | 353                | 0.5          | 2.9                   | 2.0                           | 1.02                    | 0.0029                       |

|      |     |     |     |     |      |        |
|------|-----|-----|-----|-----|------|--------|
|      | 547 | 1   | 3.8 | 1.1 | 1.13 | 0.0021 |
|      | 867 | 2   | 4.1 | 0.8 | 1.66 | 0.0019 |
| 1000 | 184 | 0.1 | 2.3 | 2.7 | 0.27 | 0.0014 |
|      | 229 | 0.2 | 2.3 | 2.6 | 0.53 | 0.0023 |

Table S3: Surface to volume ratio during the adsorption experiment by cationic starch (initial  $5 \pm 0.2 \mu\text{g/l}$ )

| Conc (ppm) | Volume (ml) | Surface area ( $\text{cm}^2$ ) | Surface to volume ratio ( $\text{m}^{-1}$ ) | Atrazine final concentration ( $\mu\text{g/l}$ ) $\pm 0.4$ | Reduction % |
|------------|-------------|--------------------------------|---------------------------------------------|------------------------------------------------------------|-------------|
| 500        | 100         | 184                            | 1.83                                        | 2.1                                                        | 56.6        |
|            | 200         | 229                            | 1.15                                        | 2.4                                                        | 50.9        |
|            | 500         | 353                            | 0.71                                        | 2.7                                                        | 44.2        |
|            | 1000        | 547                            | 0.55                                        | 3.7                                                        | 23.7        |
|            | 2000        | 867                            | 0.43                                        | 4.5                                                        | 7.2         |
| 1000       | 100         | 184                            | 1.83                                        | 1.8                                                        | 62.5        |
|            | 200         | 229                            | 1.15                                        | 2.2                                                        | 55.1        |

Table S4: Isotherm of atrazine reduction by starch based on surface area

| Conc (ppm) | Area $\text{cm}^2$<br>(control) | Volume (v) L | C $\mu\text{g/L}$<br>$5 \pm 0.2$ | $C_0 - C = X$ $\mu\text{g/L}$ | $F = X/V$ $\mu\text{g}$ | $F/M = q$ $\mu\text{g}/\text{cm}^2$ |
|------------|---------------------------------|--------------|----------------------------------|-------------------------------|-------------------------|-------------------------------------|
| 500        | 184                             | 0.1          | 2.1                              | 2.7                           | 0.27                    | 0.0015                              |
|            | 229                             | 0.2          | 2.4                              | 2.5                           | 0.49                    | 0.0022                              |
|            | 353                             | 0.5          | 2.7                              | 2.1                           | 1.07                    | 0.0030                              |
|            | 547                             | 1            | 3.7                              | 1.1                           | 1.15                    | 0.0021                              |
|            | 867                             | 2            | 4.5                              | 0.3                           | 0.70                    | 0.0008                              |

|      |     |     |     |     |      |        |
|------|-----|-----|-----|-----|------|--------|
| 1000 | 184 | 0.1 | 1.8 | 3.0 | 0.30 | 0.0016 |
|      | 229 | 0.2 | 2.2 | 2.7 | 0.53 | 0.0023 |

Table S5: 71305 adsorption isotherm data

| Area            | Volume (v) | C <sub>e</sub> | C <sub>0</sub> -C = X | F=X/V | F/M = q            |
|-----------------|------------|----------------|-----------------------|-------|--------------------|
| cm <sup>2</sup> | L          | mg/L           | mg/L                  | mg    | mg/cm <sup>2</sup> |
| (control)       |            | 188.15         |                       |       |                    |
| 184             | 0.1        | 183.3          | 4.9                   | 0.5   | 0.003              |
| 229             | 0.2        | 178.5          | 9.7                   | 1.9   | 0.008              |
| 353             | 0.5        | 174.3          | 13.9                  | 6.9   | 0.020              |
| 547             | 1          | 170.7          | 17.5                  | 17.5  | 0.032              |
| 867             | 2          | 159.4          | 28.8                  | 57.6  | 0.066              |

Table S6: Starch adsorption isotherm data

| Area            | Volume (v) | C <sub>e</sub> | C <sub>0</sub> -C = X | F=X/V | F/M = q            |
|-----------------|------------|----------------|-----------------------|-------|--------------------|
| cm <sup>2</sup> | L          | mg/L           | mg/L                  | mg    | mg/cm <sup>2</sup> |
| (control)       |            | 192.85         |                       |       |                    |
| 184             | 0.1        | 172.2          | 20.6                  | 2.1   | 0.011              |
| 229             | 0.2        | 174.6          | 18.2                  | 3.6   | 0.016              |
| 353             | 0.5        | 175.8          | 17.0                  | 8.5   | 0.024              |
| 547             | 1          | 182.2          | 10.6                  | 10.6  | 0.019              |
| 867             | 2          | 185.5          | 7.3                   | 14.6  | 0.017              |
